# Supplementary material for: Comparison of Different Electrochemical Methodologies for Electrode Reactions: A Case Study of Paracetamol
Source: MDPI journal article supplement (doi:10.3390/electrochem5010004), 2024-01-31
Supplement: s1 [file s1]

## Supplementary Information

# Comparison of Different Electrochemical Methodologies for Electrode Reactions: A Case Study of Paracetamol

Zaheer Masood <sup>1,2, \*</sup>, Haji Muhammad <sup>2</sup> and Iftikhar Ahmed Tahiri <sup>2</sup>

<sup>1</sup> School of Sustainable Chemical, Biological, and Material Engineering University of Oklahoma Norman USA; zaheer.masood-1@ou.edu: zmasood1988@gmail.com.

<sup>2</sup> Department of Chemistry, Federal Urdu University of Arts, Sciences and Technology, Gulshan-e-Iqbal, Science Campus, Karachi-75300, Pakistan

\* Correspondence zaheer.masood-1@ou.edu: zmasood1988@gmail.com. ORCID 0000-0003-2836-3754

Table S1. Electrochemical parameters for  $1 \times 10^{-6}$  M of paracetamol solution with 0.1 M of LiClO<sub>4</sub> as a supporting electrolyte

| Scan Rate (V/s) | E <sub>pa</sub> (V) | I <sub>pa</sub> (μA) | E <sub>pc</sub> (V) | I <sub>pc</sub> (-μA) | E <sub>1/2</sub> (V) | ΔE <sub>p</sub> (V) | I <sub>pc</sub> /I <sub>pa</sub> |
|-----------------|---------------------|----------------------|---------------------|-----------------------|----------------------|---------------------|----------------------------------|
| 0.030           | 0.69                | 13.12                | 0.61                | 7.42                  | 0.650                | 0.078               | 0.57                             |
| 0.050           | 0.70                | 19.22                | 0.61                | 11.20                 | 0.651                | 0.088               | 0.58                             |
| 0.080           | 0.70                | 24.88                | 0.60                | 14.47                 | 0.650                | 0.101               | 0.58                             |
| 0.100           | 0.70                | 27.52                | 0.60                | 16.40                 | 0.651                | 0.105               | 0.60                             |
| 0.130           | 0.70                | 30.00                | 0.60                | 18.00                 | 0.650                | 0.109               | 0.60                             |
| 0.150           | 0.71                | 34.14                | 0.59                | 19.85                 | 0.650                | 0.117               | 0.58                             |
| 0.180           | 0.71                | 37.40                | 0.59                | 21.44                 | 0.652                | 0.124               | 0.57                             |
| 0.200           | 0.72                | 40.25                | 0.59                | 22.80                 | 0.652                | 0.128               | 0.57                             |
| 0.230           | 0.72                | 43.43                | 0.59                | 24.40                 | 0.652                | 0.131               | 0.56                             |
| 0.250           | 0.72                | 45.80                | 0.58                | 25.73                 | 0.650                | 0.136               | 0.56                             |
| 0.280           | 0.72                | 48.17                | 0.59                | 26.91                 | 0.654                | 0.135               | 0.56                             |
| 0.300           | 0.73                | 50.83                | 0.57                | 27.48                 | 0.651                | 0.154               | 0.54                             |

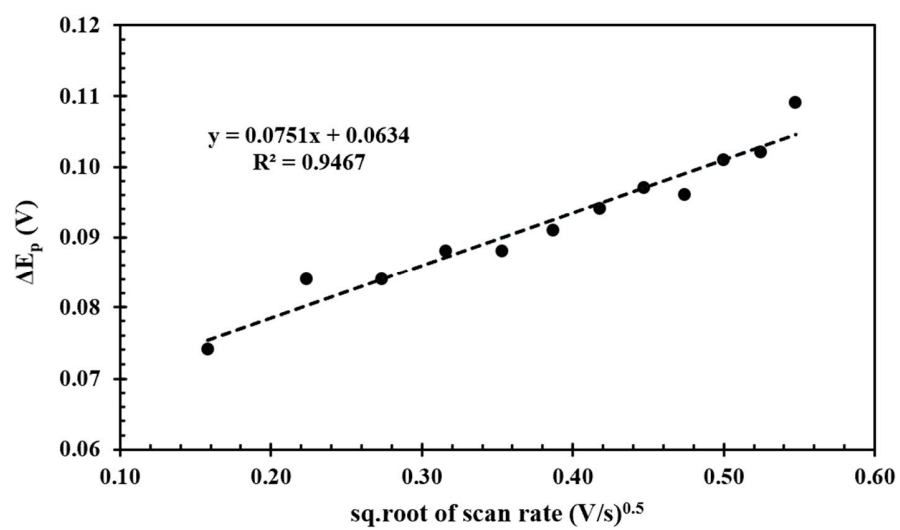

Figure S1. A plot of  $\Delta E_p$  (V) vs. sq.root of scan rate  $(V/s)^{0.5}$ .

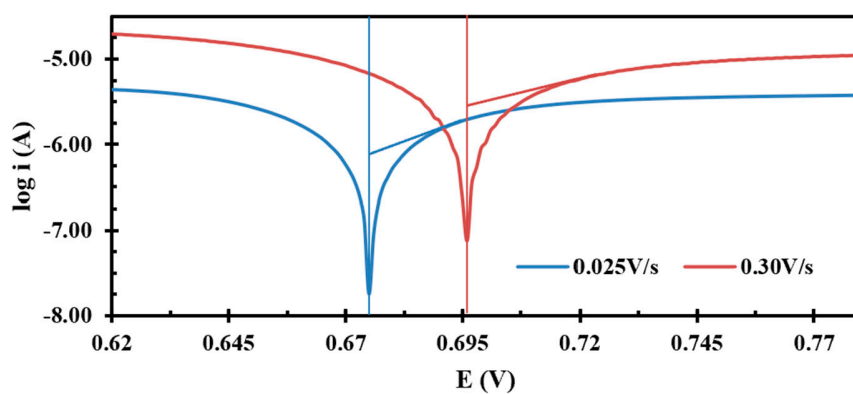

Figure S2. Tafel plots at 0.025 V/s and 0.300 V/s with tangent lines to calculate Tafel slope.
